# Supplementary material
Source: Royal Society of Chemistry journal article supplement (doi:10.1039/d6dd00131a)
Supplement: d6dd00131a1.pdf [file d6dd00131a1.pdf]

## CRem-dock: de novo design of synthetically feasible compounds guided by molecular docking

Guzel Minibaeva<sup>1</sup>, Haolin Du<sup>2</sup>, Finlay Clark,<sup>3</sup> Julien Michel,<sup>2</sup> Pavel Polishchuk<sup>1\*</sup>

<sup>1</sup> Institute of Molecular and Translational Medicine, Faculty of Medicine and Dentistry, Palacky University, Hněvotínská 1333/5, 779 00 Olomouc, Czech Republic

<sup>2</sup> EaStCHEM School of Chemistry, University of Edinburgh, Edinburgh, EH9 3FJ, United Kingdom

<sup>3</sup> School of Natural and Environmental Sciences, Newcastle University, Newcastle upon Tyne, NE1 7RU, United Kingdom

pavlo.polishchuk@upol.cz

### Supplementary materials

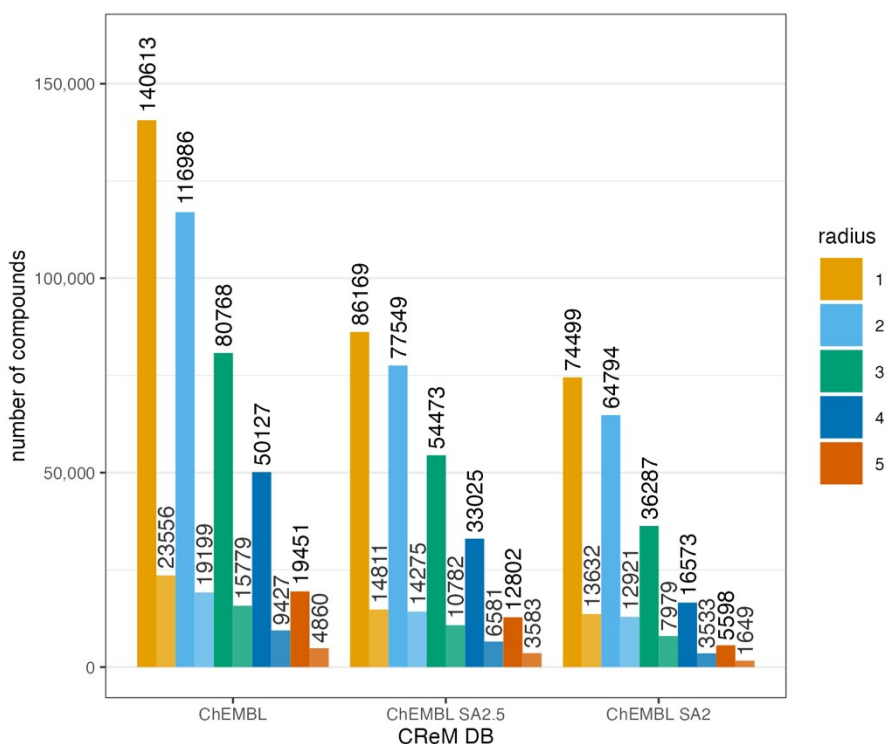

Figure S1. Average number of generated compounds for different generation settings (fragment CReM databases and context radii) across three runs. Darker color denotes the total number of generated compounds, lighter colors – the total number of generated compounds which satisfy the required ligand-protein interactions (H-bond donor and acceptor with Leu83).

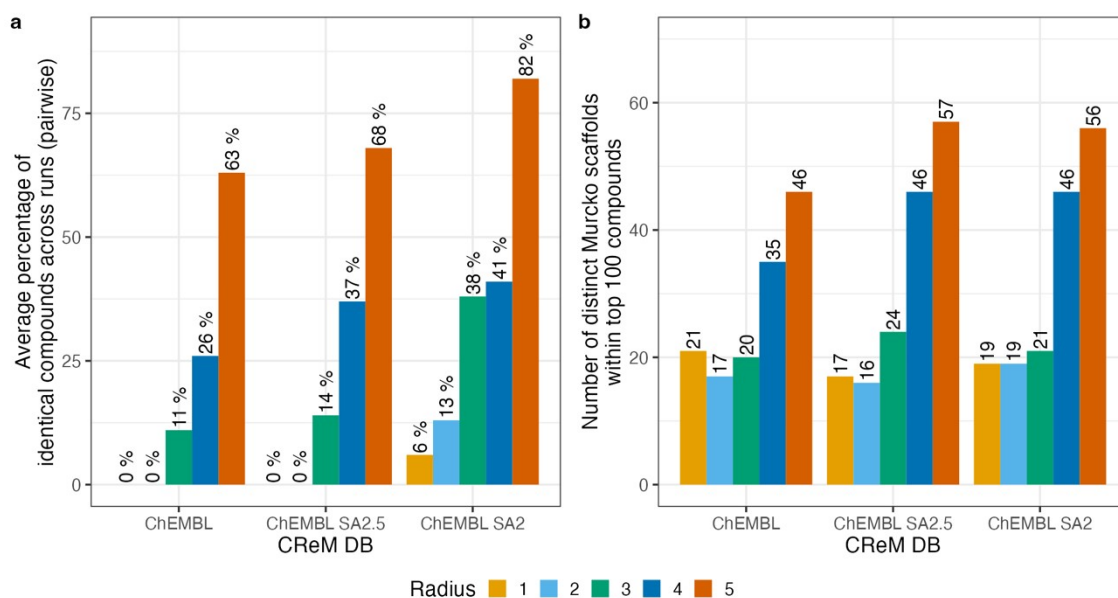

Figure S2. Statistics for top 100 compounds bound to the hinge region of CDK2. (a) Average percentage of identical structures among top 100 compounds between pairs of three independent runs for every set of generation settings. (b) The average number of distinct Murcko scaffolds among top 100 compounds across three independent runs.



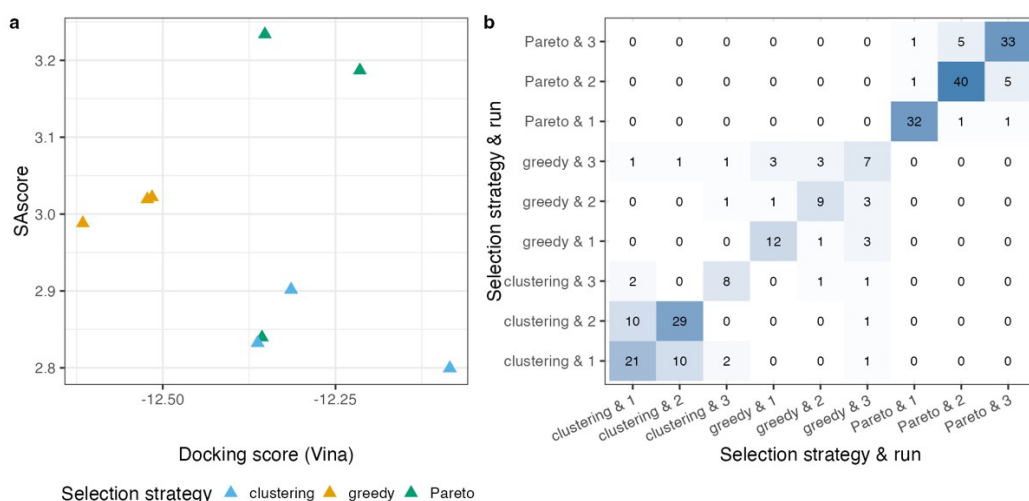

Figure S4. Statistics for top 100 molecules bound to the hinge region from three independent runs using different selection strategy (greedy, clustering and Pareto) and cluster settings (all runs used ChEMBL SA2 fragment database and radius 2). (a) Average docking and SA scores for top 100 molecules. (b) The number of distinct Murcko scaffolds among top 100 compounds for different selection strategies.

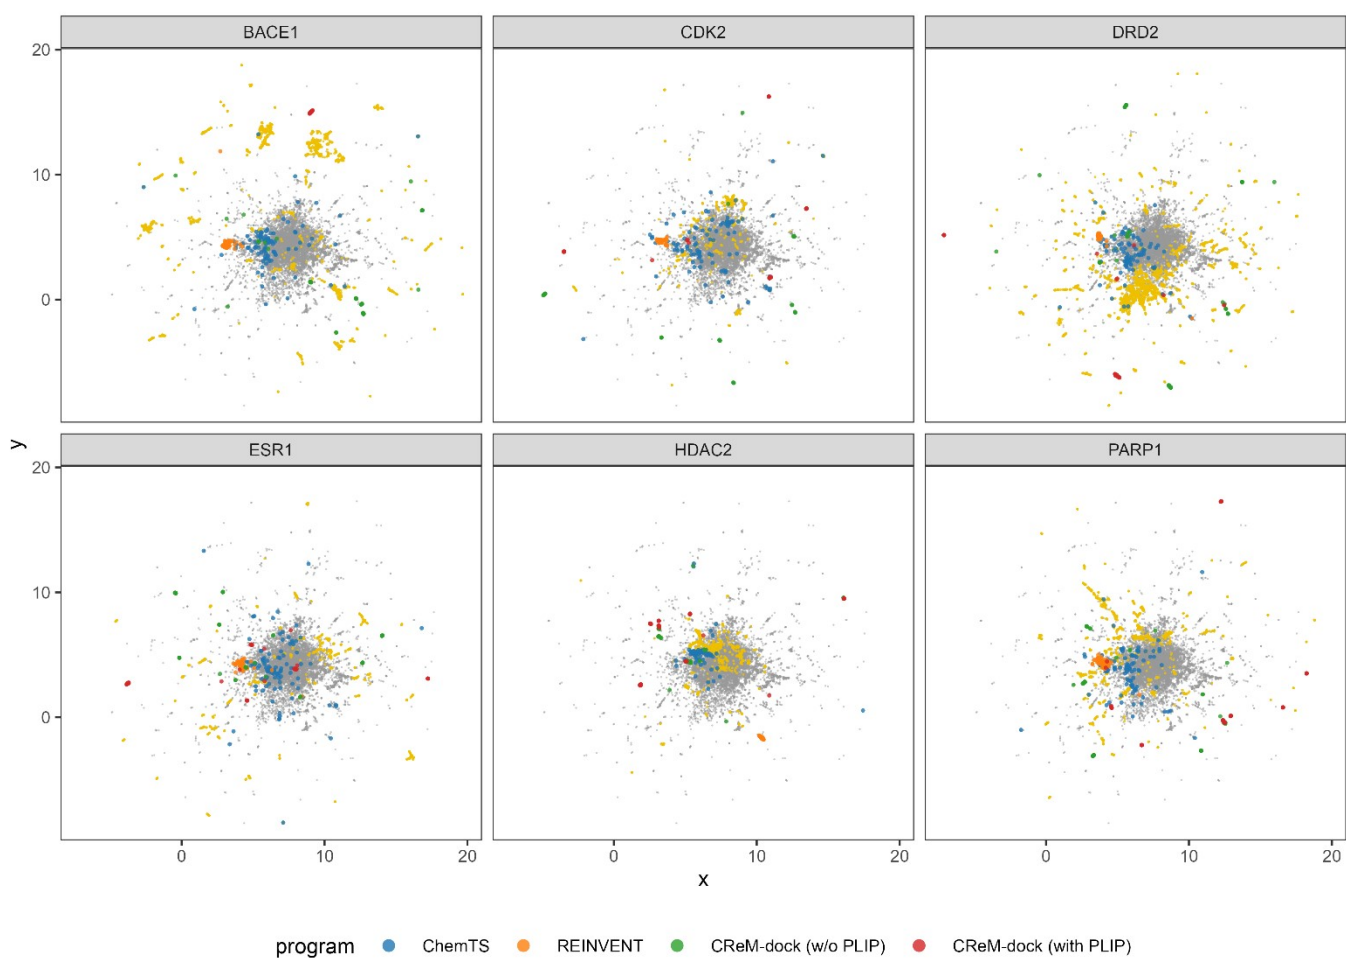

Figure S5 UMAP (the number of neighbors is 10) of top 100 compounds generated by CReM-dock and REINVENT for different targets in comparison with 50000 randomly selected ChEMBL compounds representing a reference space.

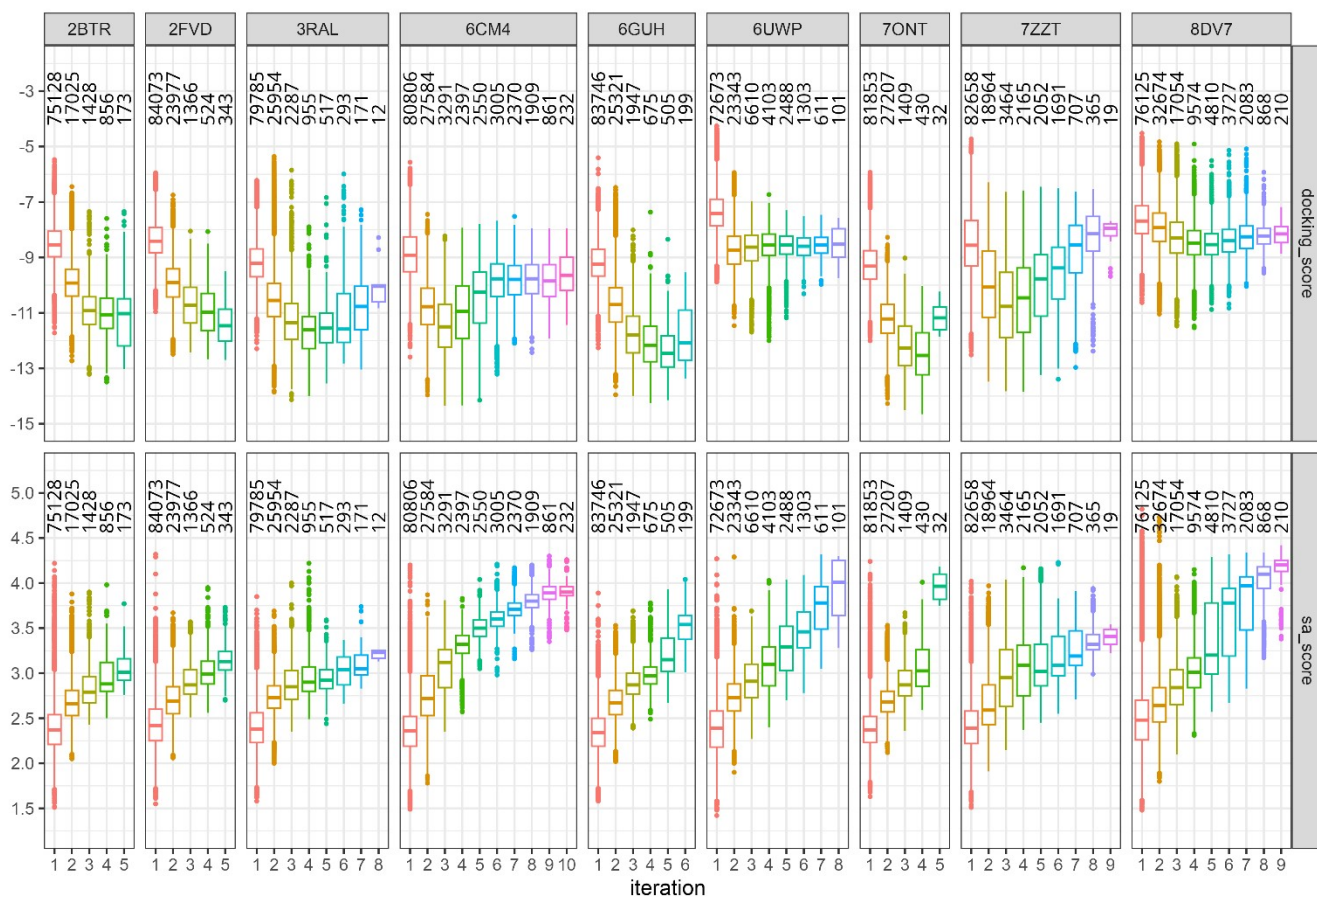

Figure S6 Distribution of docking and SA scores of all generated compounds on each iteration. The settings used for generation are the following: fragment database = ChEMBL SA2, starting fragments = ChEMBL SA2, radius = 2, selection strategy = clustering with top 2 picked compounds from each of 25 clusters, molecular mass  $\leq 450$  Da, the number of rotatable bonds  $\leq 5$ , lipophilicity  $\leq 4$ , topological polar surface area  $\leq 120\text{\AA}^2$ .

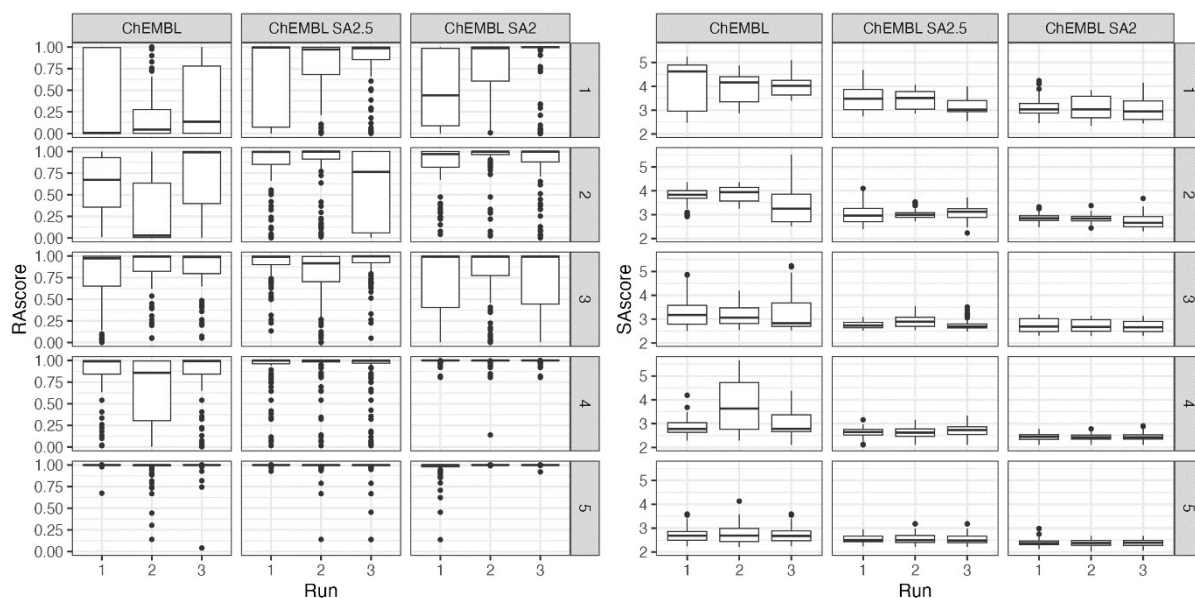

Figure S7 Distribution of RA and SA scores for top 100 structures generated by CReM-dock for 2BTR structure (CDK2) bound to the hinge region of the protein.

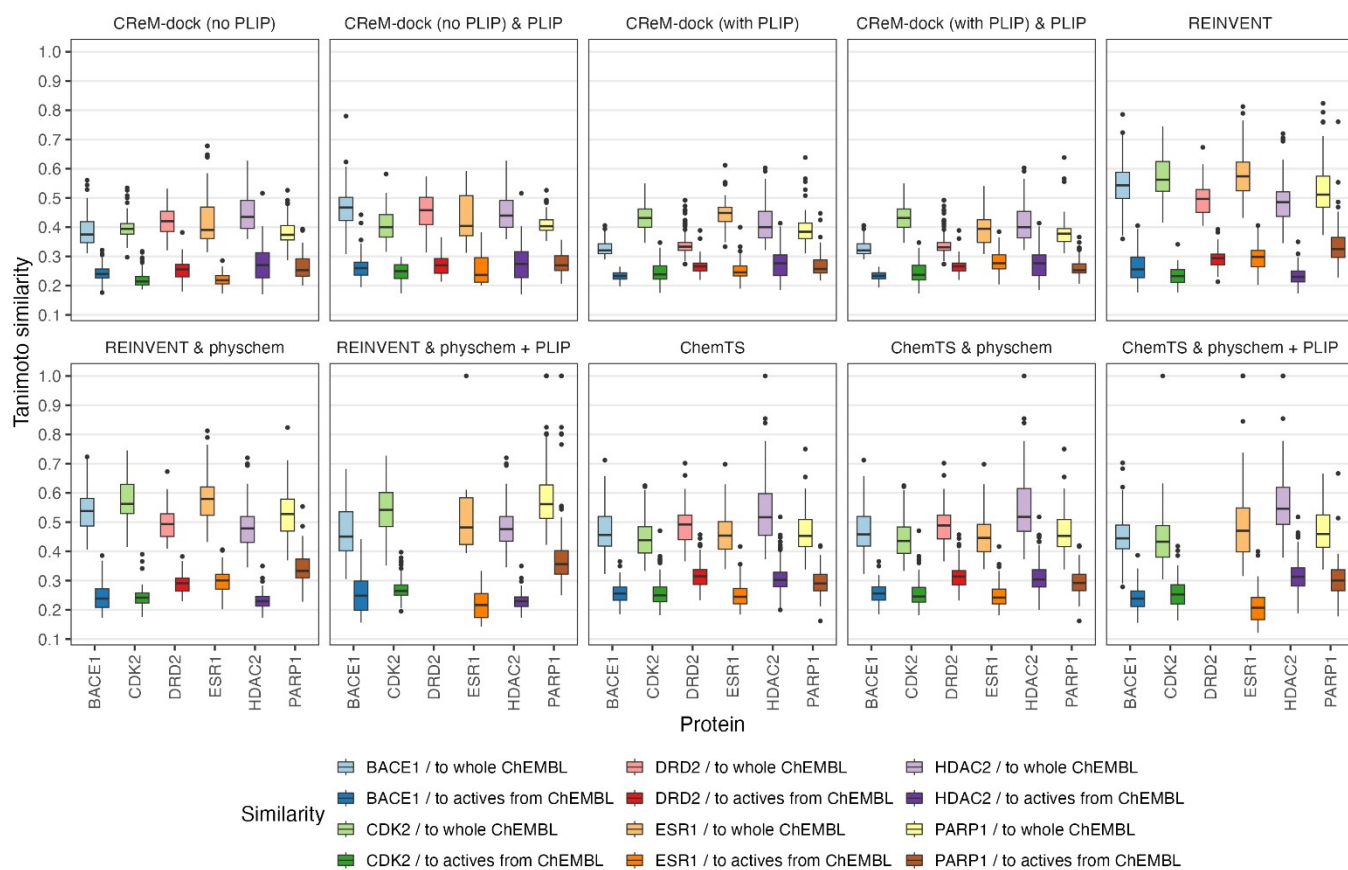

Figure S8 Novelty of top 100 structures by docking scores generated by CReM-dock, REINVENT and ChemTS (the lower the better).

Table S1. The number of generated compounds using different selection strategies and the number of compounds bind to the hinge region.

|   | selection_strategy | run | n             | n_plif       | %_plif |
|---|--------------------|-----|---------------|--------------|--------|
| 1 | Pareto             | 1   | <u>121568</u> | <u>23106</u> | 0.190  |
| 2 | Pareto             | 2   | <u>108841</u> | <u>23149</u> | 0.213  |
| 3 | Pareto             | 3   | <u>148579</u> | <u>37712</u> | 0.254  |
| 4 | clustering         | 1   | <u>89530</u>  | <u>15002</u> | 0.168  |
| 5 | clustering         | 2   | <u>87341</u>  | <u>13241</u> | 0.152  |
| 6 | clustering         | 3   | <u>89032</u>  | <u>15145</u> | 0.170  |
| 7 | greedy             | 1   | <u>90098</u>  | <u>18294</u> | 0.203  |
| 8 | greedy             | 2   | <u>90073</u>  | <u>17680</u> | 0.196  |
| 9 | greedy             | 3   | <u>91573</u>  | <u>18384</u> | 0.201  |

Table S2. Proteins chosen for the studies, the associated important protein-ligand interaction patterns, the total number of active ligands extracted from ChEMBL33 and the median docking score of these actives.

| Kinase | PDB code | Important protein-ligand interaction patterns (PLIP)             | Number of known actives from ChEMBL33 ( $pIC_{50}/pK_i \geq 6$ ) and $MW \leq 500$ | Median docking score of actives |
|--------|----------|------------------------------------------------------------------|------------------------------------------------------------------------------------|---------------------------------|
| CDK1   | 6GU2     | Glu84 (HB donor); Leu86 (HB acceptor);<br>Leu86 (HB donor)       | 742                                                                                | -8.67                           |
| CDK2   | 2BTR     | Glu81(HB donor); Leu83 (HB acceptor);<br>Leu83 (HB donor)        | 1001                                                                               | -8.9                            |
|        | 2FVD     | Glu81(HB donor); Leu83 (HB acceptor);<br>Leu83 (HB donor)        |                                                                                    |                                 |
|        | 3RAL     | Glu81(HB donor); Leu83 (HB acceptor);<br>Leu83 (HB donor)        |                                                                                    |                                 |
|        | 6GUH     | Leu85 (HB acceptor); Leu85 (HB donor)                            |                                                                                    |                                 |
| CDK5   | 4AU8     | Cys83 (HB acceptor); Cys83 (HB donor);<br>Glu81 (HB donor)       | 304                                                                                | -9.06                           |
| CDK6   | 6OQO     | Val101 (HB acceptor); Val101 (HB donor);<br>Glu99 (HB donor)     | 301                                                                                | -10.16                          |
| CDK7   | 8P4Z     | Met94 (HB acceptor); Met94 (HB donor);<br>Asp92(HB donor)        | 222                                                                                | -8.54                           |
| CDK16  | 5G6V     | Leu243 (HB acceptor); Leu243 (HB donor);<br>Glu241 (HB donor)    | 23                                                                                 | -8.77                           |
| MAPK7  | 5BYZ     | Met140 (HB acceptor); Met140 (HB donor);<br>Asp138 (HB donor)    | 73                                                                                 | -8.8                            |
| MAPK13 | 5EKO     | Met110 (HB acceptor); Met110 (HB donor);<br>Pro108 (HB donor)    | 80                                                                                 | -8.01                           |
| BACE1  | 6UWP     | Asp228 (HB donor); Asp32 (HB donor)                              | 4067                                                                               | -9.11                           |
| DRD2   | 6CM4     | Asp114 (cationic)                                                | 5109                                                                               | -9.98                           |
| ESR1   | 8DV7     | Glu353 (HB donor); Arg394 (HB acceptor);<br>His524 (HB acceptor) | 1567                                                                               | -9.29                           |
| HDAC2  | 7ZZT     | Zn601 (metal acceptor)                                           | 950                                                                                | -8.89                           |
| PARP1  | 7ONT     | Gly863 (HB donor); Gly863 (HB acceptor)                          | 2758                                                                               | -10.32                          |

Table S3. Important protein-ligand contacts observed in 2HB1, 2ZWZ, 3S1G complexes and encoded as required in the fragment expansion study.

| PDB  | PLIP                                                                                                                                  |
|------|---------------------------------------------------------------------------------------------------------------------------------------|
| 2HB1 | Lys120 (HB acceptor),<br>Arg221 (anionic),<br>Gln266 (HB acceptor),<br>Phe182 (HB acceptor)                                           |
| 3S1G | Ala232 (HB donor),<br>Asp156 (HB donor),<br>Gln203 (HB acceptor),<br>Gly230 (HB acceptor),<br>Leu231 (HB donor)                       |
| 2ZWZ | Asp224 (HB donor),<br>Glu266 (HB donor),<br>Glu66 (HB donor),<br>His128 (HB acceptor),<br>His34 (HB acceptor),<br>Trp67 (HB acceptor) |

Table S4. The total number of structures generated by CReM-dock (no PLIP) on each iteration and the number of those structures satisfying given PLIP patterns.

| protein | iteration | n     | n (PLIP > 0.6) | fraction of structures with PLIP > 0.6, % |
|---------|-----------|-------|----------------|-------------------------------------------|
| BACE1   | 0         | 23840 | 86             | 0.36                                      |
| BACE1   | 1         | 44314 | 293            | 0.66                                      |
| BACE1   | 2         | 23806 | 38             | 0.16                                      |
| BACE1   | 3         | 1577  | 1              | 0.06                                      |
| BACE1   | 4         | 574   | 0              | 0                                         |
| BACE1   | 5         | 23    | 0              | 0                                         |
| CDK2    | 0         | 23840 | 1542           | 6.47                                      |
| CDK2    | 1         | 43851 | 2236           | 5.1                                       |
| CDK2    | 2         | 22089 | 1103           | 4.99                                      |
| CDK2    | 3         | 1332  | 29             | 2.18                                      |
| CDK2    | 4         | 408   | 1              | 0.25                                      |
| CDK2    | 5         | 346   | 0              | 0                                         |
| DRD2    | 0         | 23840 | 1136           | 4.77                                      |
| DRD2    | 1         | 44593 | 2631           | 5.9                                       |
| DRD2    | 2         | 21957 | 638            | 2.91                                      |
| DRD2    | 3         | 2187  | 46             | 2.1                                       |
| DRD2    | 4         | 1342  | 19             | 1.42                                      |
| DRD2    | 5         | 869   | 26             | 2.99                                      |
| DRD2    | 6         | 1031  | 57             | 5.53                                      |
| DRD2    | 7         | 990   | 54             | 5.45                                      |
| DRD2    | 8         | 518   | 9              | 1.74                                      |
| DRD2    | 9         | 15    | 0              | 0                                         |
| ESR1    | 0         | 23840 | 158            | 0.66                                      |
| ESR1    | 1         | 43912 | 12             | 0.03                                      |
| ESR1    | 2         | 20233 | 9              | 0.04                                      |

| protein | iteration | n     | n (PLIP > 0.6) | fraction of structures with PLIP > 0.6, % |
|---------|-----------|-------|----------------|-------------------------------------------|
| ESR1    | 3         | 1936  | 1              | 0.05                                      |
| ESR1    | 4         | 1335  | 2              | 0.15                                      |
| ESR1    | 5         | 1529  | 1              | 0.07                                      |
| ESR1    | 6         | 1484  | 3              | 0.2                                       |
| ESR1    | 7         | 1310  | 0              | 0                                         |
| ESR1    | 8         | 809   | 0              | 0                                         |
| HDAC2   | 0         | 23840 | 7613           | 31.93                                     |
| HDAC2   | 1         | 47242 | 22474          | 47.57                                     |
| HDAC2   | 2         | 11160 | 5835           | 52.28                                     |
| HDAC2   | 3         | 1911  | 1231           | 64.42                                     |
| HDAC2   | 4         | 2707  | 1575           | 58.18                                     |
| HDAC2   | 5         | 2458  | 1416           | 57.61                                     |
| HDAC2   | 6         | 1937  | 1235           | 63.76                                     |
| HDAC2   | 7         | 1675  | 986            | 58.87                                     |
| HDAC2   | 8         | 1424  | 690            | 48.46                                     |
| HDAC2   | 9         | 782   | 316            | 40.41                                     |
| HDAC2   | 10        | 322   | 107            | 33.23                                     |
| PARP1   | 0         | 23840 | 1004           | 4.21                                      |
| PARP1   | 1         | 44193 | 5974           | 13.52                                     |
| PARP1   | 2         | 21715 | 1562           | 7.19                                      |
| PARP1   | 3         | 1092  | 75             | 6.87                                      |
| PARP1   | 4         | 561   | 37             | 6.6                                       |
| PARP1   | 5         | 28    | 0              | 0                                         |

Table S5. Top scoring structures generated by CReM-dock, REINVENT4 and ChemTS. The numbers below structures are SA and docking scores, respectively.

|       | CReM-dock<br>(Docking)                                                                             | CReM-dock<br>(Docking + QED)                                                                       | REINVENT4                                                                                          | REINVENT4<br>(physicochemical<br>filters)                                                           | REINVENT4<br>(physicochemical<br>filters + PLIP)                                                     |
|-------|----------------------------------------------------------------------------------------------------|----------------------------------------------------------------------------------------------------|----------------------------------------------------------------------------------------------------|-----------------------------------------------------------------------------------------------------|------------------------------------------------------------------------------------------------------|
| BACE1 | 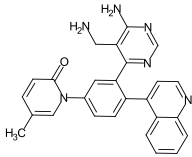<br>2.73; -11.0   | <br>2.88; -10.9   | <br>4.71; -13.8   | <br>2.40; -12.1   | <br>3.03; -10.0   |
| CDK2  | <br>2.95; -13.7   | <br>3.22; -12.2   | <br>3.63; -13.6   | <br>2.52; -12.7   | <br>2.59; -11.6   |
| DRD2  | <br>3.60; -14.4  | <br>3.39; -14.0  | <br>4.82; -15.8  | <br>2.11; -14.0  | <br>2.66; -13.6  |
| ESR1  | <br>2.99; -11.5 | <br>3.27; -11.6 | <br>2.35; -13.4 | <br>3.62; -12.5 | <br>3.47; -9.00 |
| HDAC2 | <br>2.94; -13.8 | <br>3.53; -13.6 | <br>2.41; -13.7 | <br>2.3; -13.7  | <br>2.3; -13.7  |
| PARP1 | <br>2.75; -14.6 | <br>2.48; -13.9 | <br>3.90; -16.4 | <br>5.15; -13.7 | <br>2.55; -12.8 |

Table S5 (continue)

|       | ChemTS                                                                                                 | ChemTS (physicochemical filters)                                                                       | ChemTS (physicochemical filters + PLIP)                                                                  |
|-------|--------------------------------------------------------------------------------------------------------|--------------------------------------------------------------------------------------------------------|----------------------------------------------------------------------------------------------------------|
| BACE1 | 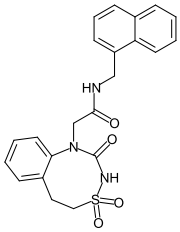 <p>2.56; -11.2</p>   |  <p>2.56; -11.2</p>   |  <p>2.91; -9.31</p>   |
| CDK2  |  <p>2.88; 11.9</p>    |  <p>2.88; 11.9</p>    |  <p>3.00; -10.5</p>   |
| DRD2  |  <p>2.41; -13.4</p>  |  <p>2.41; -13.4</p>  | -                                                                                                        |
| ESR1  |  <p>2.80; -11.2</p> |  <p>2.80; -11.2</p> |  <p>3.49; -10.7</p> |
| HDAC2 |  <p>2.70; -12.1</p> |  <p>2.70; -12.1</p> |  <p>2.70; -12.1</p> |
| PARP1 |  <p>3.18; -13.2</p> |  <p>3.18; -13.2</p> |  <p>3.10; -12.0</p> |

Table S6. Top scored generated compounds across three independent runs for each combination of settings. Compounds bind to the hinge region and have the fraction of sp<sup>3</sup> carbon atoms in scaffolds equal or greater than 0.3.

|                                                                            | Starting fragments                                                                                     |                                                                                                         |                                                                                                          |
|----------------------------------------------------------------------------|--------------------------------------------------------------------------------------------------------|---------------------------------------------------------------------------------------------------------|----------------------------------------------------------------------------------------------------------|
|                                                                            | SA2                                                                                                    | SA2 Csp <sup>3</sup> -rich                                                                              | SA2.5 Csp <sup>3</sup> -rich                                                                             |
| docking score & no fragment sampling                                       | 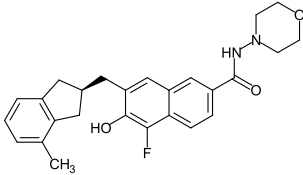 <p>3.32; -11.7</p>   |  <p>4.22; -11.8</p>   |  <p>4.39; -12.3</p>   |
| docking score & Csp <sup>3</sup> fragment sampling                         |  <p>3.56; -11.8</p>   |  <p>4.19; -11.7</p>   |  <p>3.62; -12.5</p>   |
| docking score + Csp <sup>3</sup> (BM) & no fragment sampling               |  <p>2.51; -11.6</p>   |  <p>3.78; -12.3</p>   |  <p>3.62; -12.5</p>   |
| docking score + Csp <sup>3</sup> (BM) & Csp <sup>3</sup> fragment sampling |  <p>2.65; -11.6</p> |  <p>4.35; -12.0</p> |  <p>2.78; -12.3</p> |
